# Supplementary material for: Effects of Long-term Cotton Continuous Cropping on Soil Microbiome
Source: PubMed Central journal article supplement (PMC6892916; doi:10.1038/s41598-019-54771-1), 2019-12-04
Supplement: 41598_2019_54771_MOESM1_ESM.pdf [file 41598_2019_54771_MOESM1_ESM.pdf]

Supporting information

## **Effects of Long-term Cotton Continuous Cropping on Soil Microbiome**

**Hui Xi<sup>1</sup>, Jili Shen<sup>1</sup>, Zheng Qu<sup>2</sup>, Dingyi Yang<sup>3</sup>, Shiming Liu<sup>3</sup>, Xinhui Nie<sup>1</sup> & Longfu Zhu<sup>3\*</sup>**

<sup>1</sup> College of Agronomy, Shihezi University, Shihezi 832000, P.R. China.

<sup>2</sup> State Key Laboratory of Agricultural Microbiology, Huazhong Agricultural University, Wuhan 430070, Hubei, P.R. China.

<sup>3</sup> National Key Laboratory of Crop Genetic Improvement, Huazhong Agricultural University, Wuhan 430070, Hubei, P.R. China.

\* To whom correspondence should be addressed.

National Key Laboratory of Crop Genetic Improvement, Huazhong Agricultural University, Wuhan,  
Hubei 430070, China

Tel: +86-2787283955

E-mails: [lfzhu@mail.hzau.edu.cn](mailto:lfzhu@mail.hzau.edu.cn)

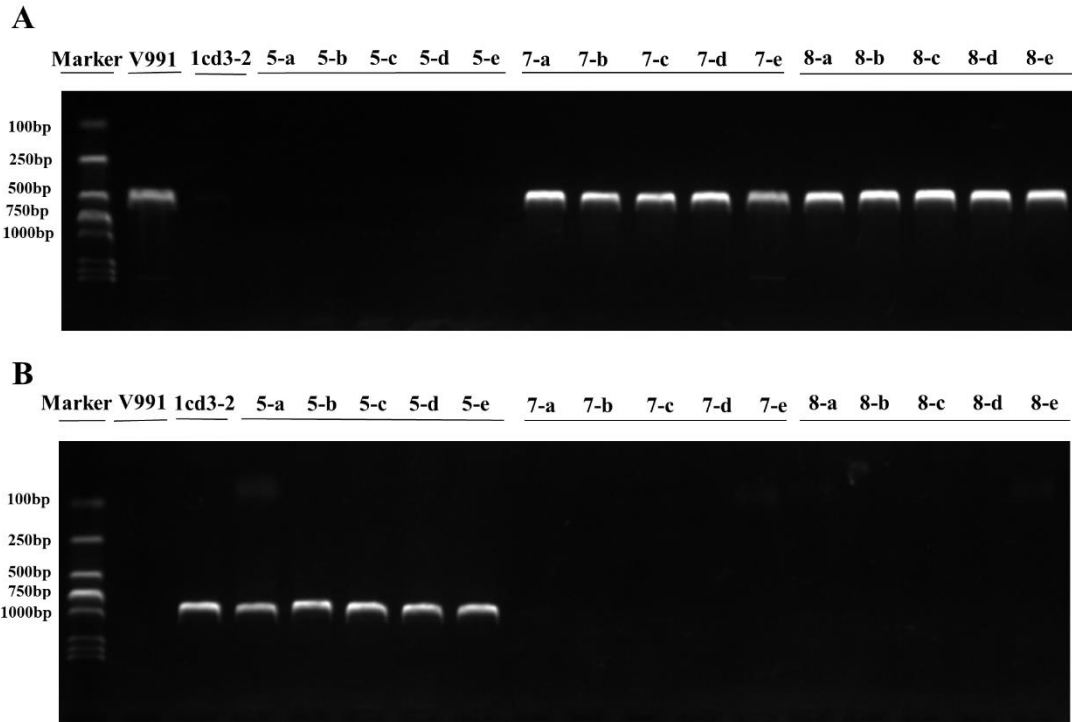

**Figure S1.** Identification of the defoliating (A) and non-defoliating (B) pathotypes of all isolates with the corresponding molecular marker (Full-length gels).

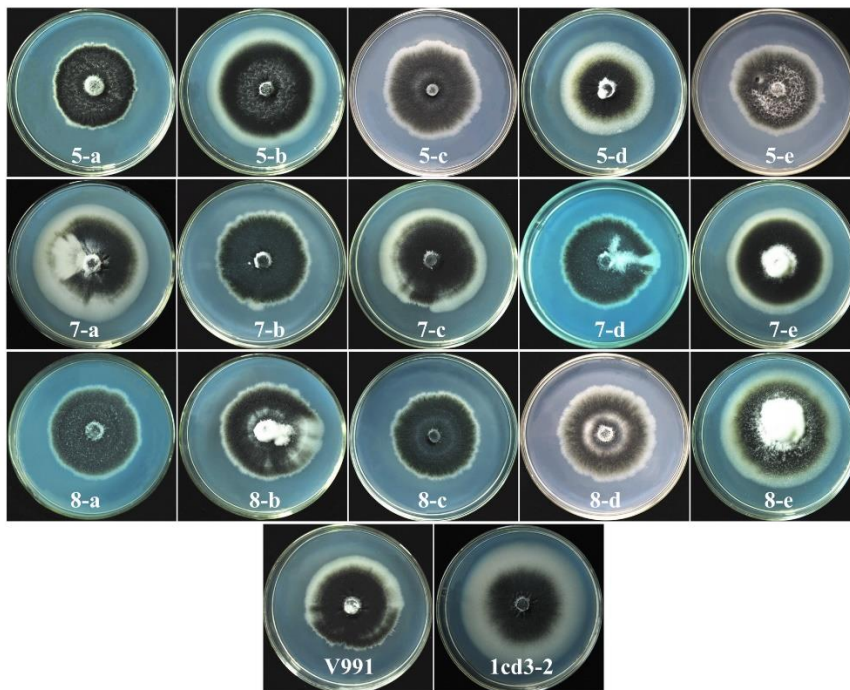

**Figure S2.** Colony morphology of 15 isolates and 2 reference isolates.

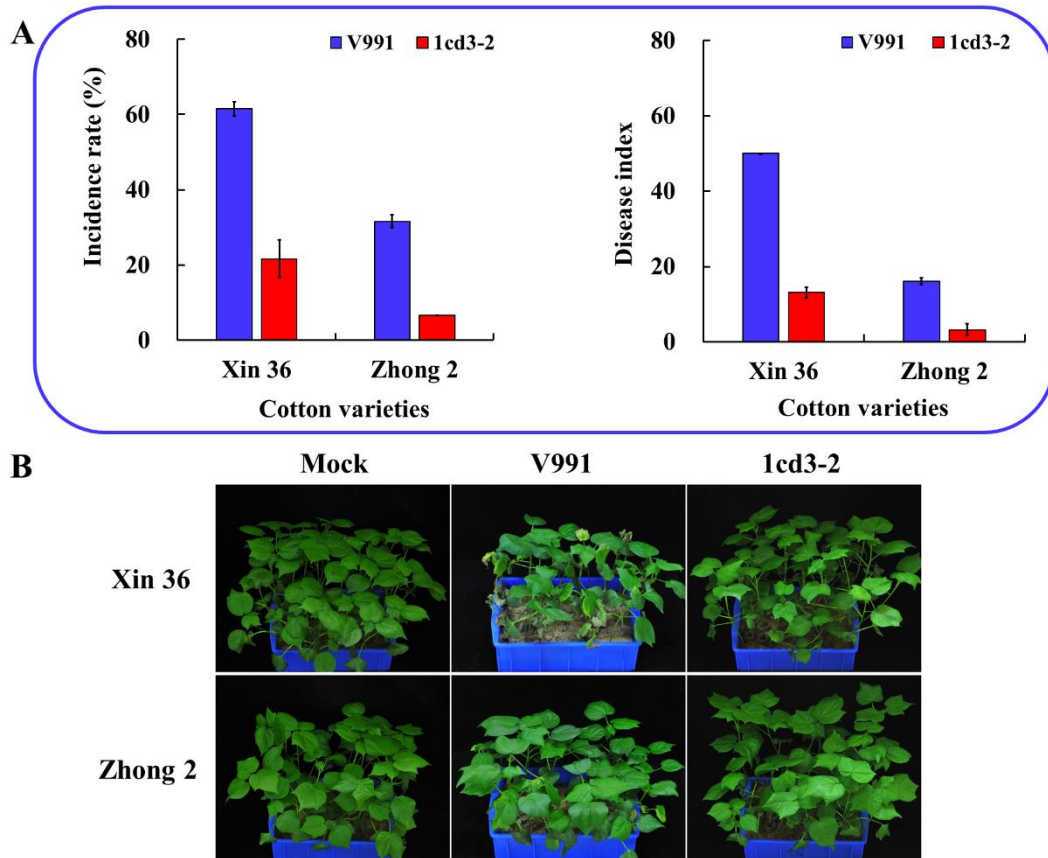

**Figure S3.** The disease incidence and phenotype of two cotton varieties after inoculated with reference isolates.

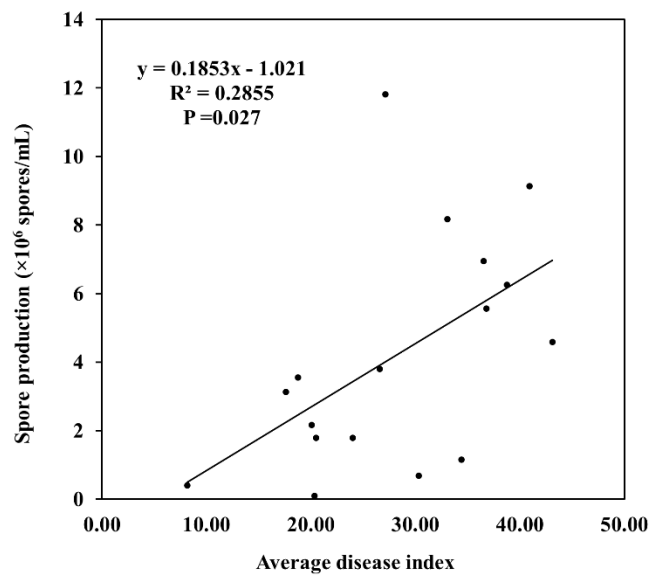

**Figure S4.** The correlations between spore production and average disease index.

| Isolates | Growth rate<br>(cm/d) | Spore production<br>( $\times 10^6$ spores/mL) | Disease index         |                      | Average disease<br>index |
|----------|-----------------------|------------------------------------------------|-----------------------|----------------------|--------------------------|
|          |                       |                                                | Xinluzao 36           | Zhongzhimian 2       |                          |
| V991     | 0.19 $\pm$ 0.02cd     | 8.17 $\pm$ 0.80abc                             | 50.00 $\pm$ 0.00abcd  | 16.14 $\pm$ 0.82bcde | 33.07 $\pm$ 0.41abcde    |
| 1cd3-2   | 0.25 $\pm$ 0.00a      | 0.4 $\pm$ 0.18g                                | 13.10 $\pm$ 1.42e     | 3.26 $\pm$ 1.59f     | 8.17 $\pm$ 1.51g         |
| 5-a      | 0.20 $\pm$ 0.01bcd    | 0.10 $\pm$ 0.00g                               | 33.28 $\pm$ 4.25de    | 7.37 $\pm$ 0.70ef    | 20.32 $\pm$ 1.78defg     |
| 5-b      | 0.20 $\pm$ 0.01bcd    | 1.78 $\pm$ 1.38efg                             | 27.08 $\pm$ 9.22de    | 13.92 $\pm$ 1.41cde  | 20.49 $\pm$ 5.32defg     |
| 5-c      | 0.19 $\pm$ 0.01cd     | 1.78 $\pm$ 1.53efg                             | 37.44 $\pm$ 7.60cde   | 10.58 $\pm$ 4.74def  | 24.01 $\pm$ 1.43cdef     |
| 5-d      | 0.19 $\pm$ 0.00cd     | 3.13 $\pm$ 1.95defg                            | 24.98 $\pm$ 1.63de    | 10.23 $\pm$ 1.06def  | 17.61 $\pm$ 1.35fg       |
| 5-e      | 0.19 $\pm$ 0.00cd     | 0.68 $\pm$ 0.12fg                              | 41.73 $\pm$ 1.02bcde  | 18.94 $\pm$ 4.45abcd | 30.33 $\pm$ 2.73abcdef   |
| 7-a      | 0.20 $\pm$ 0.00bcd    | 11.82 $\pm$ 0.28a                              | 34.44 $\pm$ 0.57de    | 19.79 $\pm$ 1.24abc  | 27.11 $\pm$ 0.9bcdef     |
| 7-b      | 0.18 $\pm$ 0.01cd     | 3.80 $\pm$ 1.50defg                            | 42.48 $\pm$ 5.38bcde  | 10.66 $\pm$ 0.18def  | 26.57 $\pm$ 2.78bcdef    |
| 7-c      | 0.19 $\pm$ 0.01cd     | 6.25 $\pm$ 3.02bcd                             | 64.46 $\pm$ 19.42abc  | 13.04 $\pm$ 4.70cde  | 38.75 $\pm$ 12.06abc     |
| 7-d      | 0.20 $\pm$ 0.01bcd    | 3.55 $\pm$ 0.76defg                            | 26.89 $\pm$ 3.50de    | 10.65 $\pm$ 0.64def  | 18.77 $\pm$ 1.43efg      |
| 7-e      | 0.18 $\pm$ 0.01cd     | 2.17 $\pm$ 1.52efg                             | 30.64 $\pm$ 0.80de    | 9.47 $\pm$ 1.41ef    | 20.05 $\pm$ 1.10defg     |
| 8-a      | 0.20 $\pm$ 0.00bcd    | 5.57 $\pm$ 0.67bcde                            | 48.62 $\pm$ 10.26abcd | 24.95 $\pm$ 3.27a    | 36.79 $\pm$ 6.77abc      |
| 8-b      | 0.18 $\pm$ 0.01cd     | 9.13 $\pm$ 0.93ab                              | 68.24 $\pm$ 19.67ab   | 13.58 $\pm$ 3.10cde  | 40.90 $\pm$ 8.29ab       |
| 8-c      | 0.21 $\pm$ 0.01bc     | 4.58 $\pm$ 0.16cdef                            | 71.93 $\pm$ 13.55a    | 14.30 $\pm$ 3.82cde  | 43.12 $\pm$ 4.87a        |
| 8-d      | 0.17 $\pm$ 0.01d      | 6.95 $\pm$ 1.27bcd                             | 50.03 $\pm$ 0.84abcd  | 23.01 $\pm$ 2.85ab   | 36.52 $\pm$ 1.84abc      |
| 8-e      | 0.22 $\pm$ 0.00b      | 1.15 $\pm$ 0.12fg                              | 42.18 $\pm$ 2.18bcde  | 26.67 $\pm$ 0.86a    | 34.42 $\pm$ 0.66abcd     |

**Table S1.** Cultural characteristics of *V. dahliae* isolates and the results of pathogenicity on two cotton varieties. Isolates from field 5F including 5-a, 5-b, 5-c, 5-d and 5-e; isolates from field 7F including 7-a, 7-b, 7-c, 7-d and 7-e; isolates from field 8F including 8-a, 8-b, 8-c, 8-d and 8-e. (Values are means  $\pm$  standard deviation. The followed same letter for a given factor are not significantly difference.  $P < 0.05$ .)
